# Supplementary material
Source: publisher figshare collection journal article supplement (https://frontiersin.figshare.com/ndownloader/files/31478099)
Supplement: Supplementary file [file 31478099]

## Supplementary Material

**Table S1: Summary of apparent affinities of different amino acids.**

| Substrates    | Experimental $K_m$ ( $\mu\text{M}$ ) | Substrates | Experimental $K_m$ ( $\mu\text{M}$ ) |
|---------------|--------------------------------------|------------|--------------------------------------|
| Serine        | $320 \pm 60$                         | Glutamine  | $6900 \pm 3700$                      |
| Alanine       | $210 \pm 40$                         | Glycine    | $560 \pm 63$                         |
| Leucine       | $53 \pm 16$                          | Lysine     | $420 \pm 44$                         |
| Methionine    | $49 \pm 12$                          | Tryptophan | $19 \pm 3$                           |
| Valine        | $140 \pm 39$                         | Histidine  | $160 \pm 31$                         |
| Phenylalanine | $43 \pm 7$                           | Cysteine   | $240 \pm 44$                         |
| Arginine      | $340 \pm 67$                         | Asparagine | $1200 \pm 300$                       |

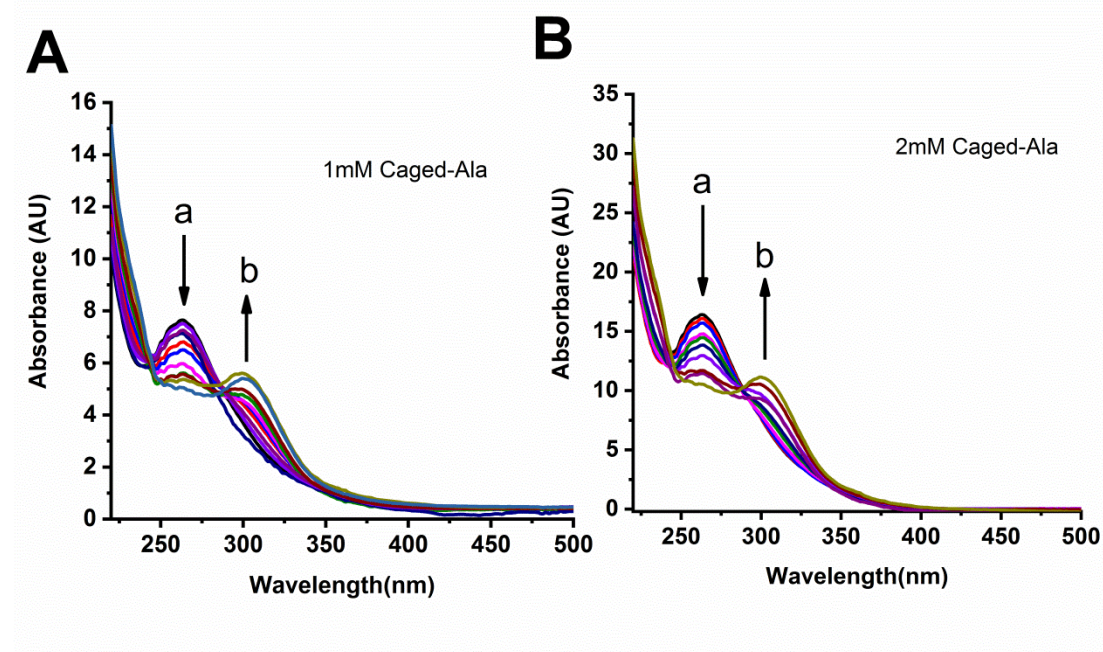

**Figure S1 (A, B)** 1 mM and 2 mM of cage alanine were subjected to laser irradiation. The absorbance was after intervals of five exposures to the laser flash. The absorbance was measured using BioSpec-nano Shimadzu Spectrophotometer. The peak **a** represents starting material and peak **b** is the photolyzed product.
